# Supplementary material for: Exploring the Antimicrobial Properties of 99 Natural Flavour and Fragrance Raw Materials against Pathogenic Bacteria: A Comparative Study with Antibiotics
Source: MDPI journal article supplement (doi:10.3390/plants12213777), 2023-11-06
Supplement: s1 [file s1]

# **Exploring the Antimicrobial Properties of 99 Natural Flavor and Fragrance Raw Materials Against Pathogenic Bacteria: A Comparative Study with Antibiotics**

Bacińska Zuzanna<sup>1,2</sup>, Baberowska Kinga<sup>1,3</sup>, Surowiak Alicja Karolina<sup>1</sup>, Balcerzak Lucyna<sup>1</sup>, Strub Daniel Jan<sup>1,\*</sup>

<sup>1</sup>Department of Chemical Biology and Bioimaging, Faculty of Chemistry, Wrocław University of Science and Technology, Wyb. Wyspiańskiego 27, 50-370 Wrocław, Poland

<sup>2</sup>Department of Engineering and Technology of Chemical Processes, Faculty of Chemistry, Wrocław University of Science and Technology, Wyb. Wyspiańskiego 27, 50-370 Wrocław, Poland

<sup>3</sup>Department of Analytical Chemistry and Chemical Metallurgy, Faculty of Chemistry, Wrocław University of Science and Technology, Wyb. Wyspiańskiego 27, 50-370 Wrocław, Poland

e-mail: daniel.strub@pwr.edu.pl

Table S1. Minimal Inhibitory Concentration (MIC) parameters of natural flavour and fragrance materials on all evaluated strains.

| No.              | English common name of natural fragrance material | Company             | CAS number  | Botanical name                                                                     | Origin       | Gram-positive bacteria |                      |                       |                   | Gram-negative bacteria |                       |                   |                   |                     |                      |
|------------------|---------------------------------------------------|---------------------|-------------|------------------------------------------------------------------------------------|--------------|------------------------|----------------------|-----------------------|-------------------|------------------------|-----------------------|-------------------|-------------------|---------------------|----------------------|
|                  |                                                   |                     |             |                                                                                    |              | <i>S. aureus</i>       | <i>K. rhizophila</i> | <i>S. epidermidis</i> | <i>C. acnes</i>   | <i>P. gergoviae</i>    | <i>P. fluorescens</i> | <i>P. putida</i>  | <i>B. cepacia</i> | <i>K. aerogenes</i> | <i>K. pneumoniae</i> |
|                  |                                                   |                     |             |                                                                                    |              | MIC assay [µg/ml]      | MIC assay [µg/ml]    | MIC assay [µg/ml]     | MIC assay [µg/ml] | MIC assay [µg/ml]      | MIC assay [µg/ml]     | MIC assay [µg/ml] | MIC assay [µg/ml] | MIC assay [µg/ml]   | MIC assay [µg/ml]    |
| Achariaceae      |                                                   |                     |             |                                                                                    |              |                        |                      |                       |                   |                        |                       |                   |                   |                     |                      |
| 1.               | Styrax gum                                        | Berje Inc.          | 8046-19-3   | <i>Liquidambar styraciflua</i> L.                                                  | Honduras     | >400                   | >400                 | 800                   | >400              | >400                   | >400                  | >400              | >400              | >400                | >400                 |
| Acoraceae        |                                                   |                     |             |                                                                                    |              |                        |                      |                       |                   |                        |                       |                   |                   |                     |                      |
| 2.               | Calamus EO                                        | Berje Inc.          | 8015-79-0   | <i>Acorus calamus</i> L.                                                           | Nepal        | 400                    | 800                  | >400                  | 800               | >400                   | 200                   | >400              | >400              | 800                 | >400                 |
| Ammonaceae       |                                                   |                     |             |                                                                                    |              |                        |                      |                       |                   |                        |                       |                   |                   |                     |                      |
| 3.               | Ylang-Ylang I EO                                  | Lluch Essence       | 8006-81-3   | <i>Cananga odorata</i> Hook. f. & Thomson forma <i>genuina</i>                     | Comoros      | >400                   | >400                 | >400                  | >400              | >400                   | >400                  | >400              | >400              | >400                | >400                 |
| 4.               | Ylang-Ylang I EO                                  | Lebermuth           | 8006-81-3   |                                                                                    | Madagascar   | 800                    | >400                 | >400                  | >400              | >400                   | >400                  | >400              | >400              | >400                | >400                 |
| 5.               | Ylang-Ylang II EO                                 | Lebermuth           | 8006-81-3   |                                                                                    | Madagascar   | 800                    | >400                 | >400                  | >400              | >400                   | >400                  | >400              | >400              | >400                | >400                 |
| 6.               | Ylang-Ylang III EO                                | Lluch Essence       | 8006-81-3   |                                                                                    | Comoros      | >400                   | >400                 | >400                  | >400              | >400                   | >400                  | >400              | >400              | >400                | >400                 |
| Apiaceae         |                                                   |                     |             |                                                                                    |              |                        |                      |                       |                   |                        |                       |                   |                   |                     |                      |
| 7.               | Angelica root Oil                                 | Ultra International | 8015-64-3   | <i>Angelica archangelica</i> L.                                                    | France       | 400                    | >400                 | >400                  | 800               | >400                   | >400                  | >400              | >400              | 800                 | >400                 |
| 8.               | Angelica root EO                                  | Berje Inc.          | 8015-64-3   |                                                                                    | Hungary      | >400                   | 400                  | >400                  | 25                | >400                   | 200                   | 200               | 800               | 800                 | >400                 |
| 9.               | Angelica seed EO                                  | Berje Inc.          | 8015-64-3   |                                                                                    | USA          | >400                   | 400                  | >400                  | 800               | >400                   | 200                   | 200               | 400               | >400                | >400                 |
| Apiaceae         |                                                   |                     |             |                                                                                    |              |                        |                      |                       |                   |                        |                       |                   |                   |                     |                      |
| 10.              | Coriander herb EO                                 | Ultra International | 8008-52-4   | <i>Coriandrum sativum</i> L.                                                       | Russia       | >400                   | 25                   | 50                    | 800               | 200                    | 200                   | 200               | 50                | 25                  | 50                   |
| 11.              | Dill seed EO                                      | Berje Inc.          | 8006-75-5   | <i>Anethum graveolens</i> L.                                                       | South Africa | 200                    | >400                 | >400                  | >400              | >400                   | >400                  | >400              | >400              | >400                | >400                 |
| 12.              | Lovage leaf EO                                    | Berje Inc.          | 8016-31-7   | <i>Levisticum officinale</i> W.D.J. Koch                                           | Hungary      | >400                   | >400                 | >400                  | >400              | >400                   | >400                  | >400              | >400              | >400                | >400                 |
| 13.              | Lovage root EO                                    | Berje Inc.          | 8016-31-7   |                                                                                    | Hungary      | 200                    | 800                  | >400                  | >400              | >400                   | 400                   | 800               | >400              | >400                | >400                 |
| 14.              | Parsley leaf EO                                   | Berje Inc.          | 8000-68-8   | <i>Petroselinum crispum</i> (Mill.) Fuss<br>syn. <i>Petroselinum sativum</i> Hoffm | Australia    | 400                    | 800                  | >400                  | >400              | >400                   | 200                   | 400               | 800               | >400                | >400                 |
| Asteraceae       |                                                   |                     |             |                                                                                    |              |                        |                      |                       |                   |                        |                       |                   |                   |                     |                      |
| 15.              | Artichoke absolute                                | A. Fakhry & Co.     | 93165-00-5  | <i>Cynara cardunculus</i> L.                                                       | Egypt        | >400                   | >400                 | >400                  | 800               | >400                   | >400                  | 400               | 800               | 100                 | >400                 |
| 16.              | Goldenrod EO                                      | Lebermuth           | 96690-40-3  | <i>Solidago canadensis</i> L.                                                      | Canada       | >400                   | >400                 | >400                  | >400              | >400                   | >400                  | 400               | >400              | >400                | >400                 |
| 17.              | Milfoil EO                                        | Berje Inc.          | 8022-07-9   | <i>Achillea millefolium</i> L.                                                     | Spain        | >400                   | >400                 | >400                  | >400              | >400                   | >400                  | >400              | >400              | >400                | >400                 |
| 18.              | Mugwort EO                                        | Ultra International | 8008-93-3   | <i>Artemisia taurica</i> Willd.                                                    | Russia       | >400                   | 100                  | >400                  | >400              | >400                   | >400                  | >400              | >400              | >400                | >400                 |
| 19.              | Tagete EO                                         | A. Fakhry & Co.     | 8016-84-0   | <i>Tagetes minuta</i> L.<br>syn. <i>Tagetes glandulifera</i> Schrank               | Egypt        | >400                   | >400                 | >400                  | >400              | >400                   | 200                   | >400              | >400              | >400                | >400                 |
| 20.              | Tagete EO                                         | Berje Inc.          | 8016-84-0   |                                                                                    | Zimbabwe     | 400                    | >400                 | 800                   | >400              | >400                   | 200                   | 400               | >400              | >400                | >400                 |
| 21.              | Wormwood herb EO                                  | Berje Inc.          | 8008-93-3   | <i>Artemisia absinthium</i> L.                                                     | Russia       | >400                   | >400                 | >400                  | >400              | >400                   | >400                  | >400              | >400              | >400                | >400                 |
| 22.              | Wormwood herb EO                                  | Berje Inc.          | 8008-93-3   | <i>Artemisia absinthium</i> L.                                                     | USA          | >400                   | >400                 | >400                  | >400              | >400                   | >400                  | >400              | >400              | >400                | >400                 |
| Cistaceae        |                                                   |                     |             |                                                                                    |              |                        |                      |                       |                   |                        |                       |                   |                   |                     |                      |
| 23.              | Cistus SEV absolute                               | Albert Vieille      | 8016-26-0   | <i>Cistus ladanifer</i> L.                                                         | Spain        | >400                   | >400                 | >400                  | >400              | >400                   | >400                  | >400              | >400              | >400                | >400                 |
| 24.              | Labdanum gum refined                              | Berje Inc.          | 8016-26-0   |                                                                                    | Spain        | >400                   | 200                  | 100                   | 800               | 800                    | 200                   | 200               | 200               | 100                 | 400                  |
| Cupressaceae     |                                                   |                     |             |                                                                                    |              |                        |                      |                       |                   |                        |                       |                   |                   |                     |                      |
| 25.              | Blue cypress EO                                   | Ultra International | 187348-13-6 | <i>Callitris intratropica</i> Baker & H.G.Sm.                                      | Australia    | 50                     | 50                   | 50                    | 400               | 200                    | 100                   | 25                | 25                | 50                  | 100                  |
| 26.              | Hinoki EO                                         | Ultra International | 91745-97-0  | <i>Chamaecyparis obtusa</i> (Siebold & Zucc.) Endl.                                | Japan        | 100                    | 200                  | 400                   | 800               | >400                   | 200                   | 100               | 200               | 400                 | >400                 |
| 27.              | Juniper berry CO <sub>2</sub>                     | Ultra International | 8012-91-7   | <i>Juniperus communis</i> L.                                                       | India        | 200                    | 25                   | 25                    | 800               | 50                     | 50                    | 100               | 50                | 25                  | 100                  |
| 28.              | Siam wood EO                                      | Berje Inc.          | 8022-47-7   | <i>Fokienia hodginsii</i> (Dunn) A.Henry & H H.Thomas                              | Vietnam      | >800                   | 800                  | 800                   | 800               | >400                   | >400                  | 400               | 800               | 800                 | 800                  |
| Dipterocarpaceae |                                                   |                     |             |                                                                                    |              |                        |                      |                       |                   |                        |                       |                   |                   |                     |                      |
| 29.              | Gurjun Balsam rectified (Copaene)                 | Lluch Essence       | 8030-55-5   | <i>Dipterocarpus</i> C. F. Gaertner                                                | Indonesia    | >400                   | >400                 | >400                  | >400              | >400                   | >400                  | 400               | >400              | >400                | >400                 |
| Euphorbiaceae    |                                                   |                     |             |                                                                                    |              |                        |                      |                       |                   |                        |                       |                   |                   |                     |                      |
| 30.              | Cascarilla bark EO                                | Berje Inc.          | 28231-03-0  | <i>Croton eluteria</i> (L.) W. Wright<br>syn. <i>Clutia eluterzia</i> L.           | El Salvador  | >400                   | 200                  | 200                   | 800               | >400                   | >400                  | 200               | 400               | 400                 | >400                 |
| Fabaceae         |                                                   |                     |             |                                                                                    |              |                        |                      |                       |                   |                        |                       |                   |                   |                     |                      |
| 31.              | Copaiba Balsam                                    | Lluch Essence       | 8001-61-4   | <i>Copaifera officinalis</i> L.                                                    | Brazil       | 100                    | 25                   | 200                   | >400              | 800                    | >400                  | 400               | 200               | 800                 | >400                 |
| 32.              | Peru balsam resin                                 | Lebermuth           | 8007-00-9   | <i>Myroxylon peruiferum</i> L.f.                                                   | Peru         | >400                   | >400                 | >400                  | >400              | >400                   | >400                  | >400              | >400              | >400                | >400                 |
| Geraniaceae      |                                                   |                     |             |                                                                                    |              |                        |                      |                       |                   |                        |                       |                   |                   |                     |                      |
| 33.              | Rose geranium EO                                  | Eucaforest          | 90082-55-6  | <i>Pelargonium graveolens</i> L'Hér.                                               | South Africa | >400                   | >400                 | >400                  | >400              | >400                   | 400                   | 800               | >400              | >400                | >400                 |
| Iridaceae        |                                                   |                     |             |                                                                                    |              |                        |                      |                       |                   |                        |                       |                   |                   |                     |                      |
| 34.              | Orris root concentrate                            | Berje Inc.          | 8002-73-1   | <i>Iris pallida</i> Lam.                                                           | France       | 100                    | 400                  | 400                   | 800               | 800                    | >400                  | >400              | 800               | 400                 | 800                  |
| Lamiaceae        |                                                   |                     |             |                                                                                    |              |                        |                      |                       |                   |                        |                       |                   |                   |                     |                      |

|               |                                       |                       |            |                                                                                               |                           |        |      |      |      |      |      |      |      |      |      |      |
|---------------|---------------------------------------|-----------------------|------------|-----------------------------------------------------------------------------------------------|---------------------------|--------|------|------|------|------|------|------|------|------|------|------|
| 35.           | Basil oleoresin                       | Lluch Essence         | 8015-73-4  | Ocimum basilicum L.                                                                           | India                     | 800    | 800  | >400 | >400 | >400 | >400 | 800  | 800  | 800  | >400 |      |
| 36.           | Basil sweet CT (linalool) EO          | Vessel Essential Oils | 8015-73-4  |                                                                                               | Greece                    | >400   | >400 | >400 | >400 | >400 | >400 | >400 | >400 | >400 | >400 |      |
| 37.           | Basil tropical CT (methylchavicol) EO | A. Fakhry & Co.       | 8015-73-4  |                                                                                               | Egypt                     | >400   | >400 | >400 | >400 | >400 | >400 | >400 | >400 | >400 | >400 |      |
| 38.           | Catnip (catmint) EO                   | Berje Inc.            | 8023-84-5  | Nepeta cataria L.                                                                             | Canada                    | >400   | 800  | >400 | 100  | >400 | 200  | 400  | >400 | >400 | >400 |      |
| 39.           | Lavandin abrialis EO                  | Berje Inc.            | 8022-15-9  | Lavandula angustifolia Mill. × Lavandula latifolia Medik.                                     | France                    | >400   | >400 | >400 | >400 | >400 | >400 | >400 | >400 | >400 | >400 |      |
| 40.           | Origanum oleoresin                    | Lluch Essence         | 8007-11-2  | Origanum vulgare L.                                                                           | Turkey                    | 400    | >400 | >400 | >400 | >400 | >400 | >400 | >400 | >400 | >400 |      |
| 41.           | Peppermint Yakima EO                  | Berje Inc.            | 8006-90-4  | Mentha x piperita L.                                                                          | USA                       | >400   | >400 | >400 | >400 | >400 | >400 | >400 | >400 | >400 | >400 |      |
| 42.           | Peppermint tails EO                   | Lebermuth             | N/A        |                                                                                               | Italy                     | >400   | >400 | >400 | >400 | >400 | >400 | >400 | >400 | >400 | >400 |      |
| 43.           | Perilla EO                            | Berje Inc.            | 68132-21-8 | Perilla frutescens (L.) Britton                                                               | China                     | >400   | >400 | >400 | >400 | >400 | >400 | >400 | >400 | >400 | >400 |      |
| 44.           | Savory summer EO                      | Berje Inc.            | 8016-68-0  | Satureja hortensis L.                                                                         | Hungary                   | >400   | 800  | >400 | >400 | >400 | 400  | 800  | 800  | >400 | >400 |      |
| 45.           | Thyme red oleoresin                   | Lluch Essence         | 8007-46-3  | Thymus vulgaris L.                                                                            | Turkey                    | 400    | >400 | >400 | >400 | >400 | >400 | 400  | >400 | >400 | >400 |      |
| Lauraceae     |                                       |                       |            |                                                                                               |                           |        |      |      |      |      |      |      |      |      |      |      |
| 46.           | Laurel Oleoresin                      | Lluch Essence         | 8007-48-5  | Laurus nobilis L.                                                                             | Spain                     | 400    | 800  | >400 | 800  | >400 | >400 | 800  | 800  | 800  | 800  |      |
| 47.           | Ocotea cymbarum EO                    | Berje Inc.            | 68917-09-9 | Ocotea cymbarum Kunth                                                                         | China                     | >400   | >400 | >400 | >400 | >400 | >400 | >400 | >400 | >400 | >400 |      |
| 48.           | Ravintsara EO                         | Lluch Essence         | 92201-50-8 | Cinnamomum camphora Ness et Eberm.                                                            | Madagascar                | >400   | >400 | >400 | >400 | >400 | >400 | >400 | >400 | >400 | >400 |      |
| 49.           | Rosewood (Bois de rose) EO            | Berje Inc.            | 8015-77-8  | Aniba rosodora Ducke                                                                          | India                     | >400   | >400 | >400 | >400 | >400 | 200  | >400 | >400 | >400 | >400 |      |
| 50.           | Sassafras EO                          | Berje Inc.            | 8006-80-2  | Sassafras albidum (Nutt.) Nees                                                                | Taiwan                    | >400   | >400 | >400 | >400 | >400 | >400 | >400 | >400 | >400 | >400 |      |
| Meliaceae     |                                       |                       |            |                                                                                               |                           |        |      |      |      |      |      |      |      |      |      |      |
| 51.           | Neem oil (exp.)                       | Lebermuth             | 8002-65-1  | Azadirachta indica A. Juss.                                                                   | India                     | 800    | >400 | >400 | >400 | >400 | >400 | >400 | >400 | >400 | >400 |      |
| Myrtaceae     |                                       |                       |            |                                                                                               |                           |        |      |      |      |      |      |      |      |      |      |      |
| 52.           | Blue mallee EO                        | Lebermuth             | 91771-67-4 | Eucalyptus polybractea R. T. Baker                                                            | Australia                 | >400   | >400 | >400 | >400 | >400 | >400 | >400 | >400 | >400 | >400 |      |
| 53.           | Eucalyptus kochii EO                  | Ultra International   | 97926-42-6 | Eucalyptus kochii Maiden & Blakely                                                            | Australia                 | >400   | >400 | >400 | >400 | >400 | 200  | >400 | >400 | >400 | >400 |      |
| 54.           | Eucalyptus smithii EO                 | Eucaforest            | 91771-68-5 | Eucalyptus smithii R. T. Baker                                                                | South Africa              | >400   | >400 | >400 | >400 | >400 | >400 | >400 | >400 | >400 | >400 |      |
| 55.           | Kunzea EO                             | Ultra International   | 97553-36-1 | Kunzea ambigua (Sm.) Druce                                                                    | Australia                 | >400   | >400 | >400 | >400 | >400 | >400 | 400  | >400 | >400 | >400 |      |
| 56.           | Lemon Myrtle EO                       | Ultra International   | 84775-80-4 | Backhousia citriodora F. Muell.                                                               | Australia                 | 400    | >400 | >400 | >400 | >400 | 400  | 800  | >400 | >400 | >400 |      |
| 57.           | Lemon scented tea tree EO             | Eucaforest            | 85085-43-4 | Leptospermum petersonii F. M. Bailey<br>syn. Leptospermum citratum Challinor, Cheel & Penfold | South Africa              | >400   | >400 | >400 | >400 | >400 | >400 | >400 | >400 | >400 | >400 |      |
| 58.           | Rosalina EO                           | Ultra International   | 68647-73-4 | Melaleuca ericifolia Sm.                                                                      | Australia                 | >400   | 200  | >400 | 800  | >400 | 200  | 200  | 200  | >400 | >400 |      |
| 59.           | Tea tree EO                           | Lebermuth             | 68647-73-4 | Melaleuca alternifolia (Maiden & Betche) Cheel                                                | China                     | >400   | >400 | >400 | >400 | >400 | >400 | >400 | >400 | >400 | >400 |      |
| 60.           | Tea tree EO                           | Eucaforest            | 68647-73-4 |                                                                                               | South Africa              | >400   | >400 | >400 | >400 | >400 | >400 | 200  | 200  | >400 | >400 | >400 |
| Pinaceae      |                                       |                       |            |                                                                                               |                           |        |      |      |      |      |      |      |      |      |      |      |
| 61.           | Cedarwood Himalayan EO                | Lebermuth             | 68991-36-6 | Cedrus deodora (Roxb. ex Lamb.) G.Don                                                         | India                     | >400   | >400 | >400 | >400 | >400 | >400 | 400  | >400 | >400 | >400 |      |
| 62.           | Fir needle EO                         | Berje Inc.            | 8024-15-5  |                                                                                               | Abies balsamea (L.) Mill. | Canada | 400  | >400 | >400 | >400 | >400 | 200  | 200  | >400 | >400 | >400 |
| 63.           | Fir balsam absolute                   | Berje Inc.            | 8024-15-5  |                                                                                               |                           | Canada | 200  | 12.5 | 50   | 25   | 100  | 50   | 12.5 | 50   | 25   | 100  |
| 64.           | Fir balsam concrete                   | Berje Inc.            | 8024-15-5  |                                                                                               |                           | Canada | 400  | 200  | 100  | 100  | >400 | >400 | 50   | 100  | 200  | 400  |
| 65.           | Pine pumilio EO                       | Berje Inc.            | 616-768-0  | Pinus pumilio Turra                                                                           | Germany                   | >400   | >400 | >400 | >400 | >400 | 200  | 800  | >400 | >400 | >400 |      |
| 66.           | Spruce absolute                       | Berje Inc.            | 294-420-3  | Picea glauca/Picea mariana (Mill.) Britton, Sterns & Poggenb.                                 | Canada                    | >400   | 800  | 800  | >400 | >400 | >400 | 400  | 800  | 800  | 800  |      |
| 67.           | Spruce black EO                       | Lebermuth             | 91722-19-9 | Picea mariana (Mill.) Britton, Sterns & Poggenb.                                              | Canada                    | >400   | >400 | >400 | >400 | >400 | >400 | >400 | >400 | >400 | >400 |      |
| Piperaceae    |                                       |                       |            |                                                                                               |                           |        |      |      |      |      |      |      |      |      |      |      |
| 68.           | Cubeb EO                              | Berje Inc.            | 290-148-4  | Piper cubeba L.                                                                               | Singapore                 | >400   | 200  | 200  | 25   | >400 | >400 | 12.5 | 200  | 200  | >400 |      |
| 69.           | Black pepper oleoresin 40/20          | Lluch Essence         | 8002-56-0  | Piper nigrum L.                                                                               | India                     | 100    | 800  | 800  | 800  | >400 | >400 | 400  | 800  | >400 | >400 |      |
| Poaceae       |                                       |                       |            |                                                                                               |                           |        |      |      |      |      |      |      |      |      |      |      |
| 70.           | Vetiver CO <sub>2</sub>               | Ultra International   | 8016-96-4  | Chrysopogon zizanioides (L.) Roberty<br>syn. Vetiveria zizanioides (L.) Nash                  | India                     | >400   | 200  | 100  | 800  | 200  | 200  | 100  | 100  | 400  | 200  |      |
| Ranunculaceae |                                       |                       |            |                                                                                               |                           |        |      |      |      |      |      |      |      |      |      |      |
| 71.           | Black seed expressed EO               | Ultra International   | 90064-32-7 | Nigella sativa L.                                                                             | India                     | 25     | 800  | >400 | 800  | 200  | 200  | >400 | >400 | 200  | 200  |      |
| Rosaceae      |                                       |                       |            |                                                                                               |                           |        |      |      |      |      |      |      |      |      |      |      |
| 72.           | Rose absolute                         | Ultra International   | 8007-01-0  | Rosa x damascena Mill.                                                                        | Bulgaria                  | 400    | >400 | >400 | >400 | >400 | 400  | >400 | >400 | >400 | >400 |      |
| 73.           | Rose absolute                         | Ultra International   | 8007-01-0  |                                                                                               | Morocco                   | >400   | >400 | >400 | >400 | >400 | 400  | >400 | >400 | >400 | >400 |      |
| 74.           | Rose EO                               | Ultra International   | 8007-01-0  |                                                                                               | Bulgaria                  | 800    | >400 | >400 | >400 | >400 | >400 | >400 | >400 | >400 | >400 |      |
| 75.           | Rose EO                               | Ultra International   | 8007-01-0  |                                                                                               | Turkey                    | >800   | >400 | >400 | >400 | >400 | >400 | 400  | >400 | >400 | >400 |      |

| Rubiaceae           |                                     |                          |              |                                                                                              |              |       |       |        |       |       |       |       |       |       |       |
|---------------------|-------------------------------------|--------------------------|--------------|----------------------------------------------------------------------------------------------|--------------|-------|-------|--------|-------|-------|-------|-------|-------|-------|-------|
| 76.                 | Coffee Arabica CO <sub>2</sub>      | Ultra International      | 8001-67-0    | <i>Coffea arabica</i> L.                                                                     | India        | >400  | >400  | >400   | >400  | >400  | >400  | >400  | >400  | >400  | >400  |
| 77.                 | Coffee Robusta CO <sub>2</sub>      | Ultra International      | 8001-67-0    | <i>Coffea canephora</i> Pierre ex Froehner                                                   | India        | >400  | >400  | 800    | >400  | >400  | 200   | >400  | >400  | >400  | >400  |
| 78.                 | Coffee EO                           | Berje Inc.               | 8001-67-0    | <i>Coffea arabica</i> L.                                                                     | El Salvador  | 200   | >400  | 800    | 800   | >400  | 100   | 200   | >400  | >400  | >400  |
| Rutaceae            |                                     |                          |              |                                                                                              |              |       |       |        |       |       |       |       |       |       |       |
| 79.                 | Buchu leaf EO                       | Berje Inc.               | 68650-46-4   | <i>Agathosma betulina</i> (P.J. Bergius) Pillans                                             | South Africa | >400  | >400  | >400   | >400  | >400  | 200   | 400   | >400  | >400  | >400  |
| 80.                 | Buchu leaf EO                       | Berje Inc.               | 68650-46-4   | <i>Agathosma crenulate</i> L.                                                                | South Africa | >400  | >400  | >400   | >400  | >400  | 200   | 400   | >400  | >400  | >400  |
| 81.                 | Buchu leaf EO                       | Ultra International      | 68650-46-4   | <i>Agathosma betulina</i> Berg.                                                              | South Africa | >400  | >400  | >400   | >400  | >400  | >400  | >400  | >400  | >400  | >400  |
| 82.                 | Grapefruit red EO                   | Lebermuth                | 8016-20-4    | <i>Citrus x paradisi</i> Macfad.                                                             | USA          | 400   | >400  | >400   | >400  | >400  | >400  | >400  | >400  | >400  | >400  |
| 83.                 | Kumquat EO                          | Ultra International      | N/A          | <i>Fortunella japonica</i> Swingle                                                           | Brazil       | >400  | >400  | >400   | >400  | >400  | >400  | >400  | >400  | >400  | >400  |
| 84.                 | Mandarin red EO                     | Berje Inc.               | 8008-31-9    | <i>Citrus reticulata</i> Blanco<br>syn. <i>Citrus nobilis</i> Andrews                        | Argentina    | >400  | >400  | >400   | >400  | >400  | >400  | >400  | >400  | >400  | >400  |
| 85.                 | Orange bitter (fruit), distilled EO | A. Fakhry & Co.          | 68916-04-1   | <i>Citrus x aurantium</i> L. var. <i>amara</i>                                               | Egypt        | 800   | >400  | >400   | >400  | >400  | >400  | 400   | >400  | >400  | >400  |
| 86.                 | Orange blood EO                     | Ultra International      | 8008-57-9    | <i>Citrus sinensis</i> (L.) Osbeck                                                           | Italy        | >400  | >400  | >400   | >400  | >400  | >400  | >400  | >400  | >400  | >400  |
| Santalaceae         |                                     |                          |              |                                                                                              |              |       |       |        |       |       |       |       |       |       |       |
| 87.                 | Australian sandalwood EO            | Dutjahn Sandalwoods Oils | 8024-35-9    | <i>Santalum spicatum</i> (R.Br.) A. DC<br>syn. <i>Eucarya spicata</i> (R.Br.) Sprag et Summ. | Australia    | >400  | 400   | 100    | 400   | 800   | >400  | 200   | 400   | 800   | >400  |
| Schisandraceae      |                                     |                          |              |                                                                                              |              |       |       |        |       |       |       |       |       |       |       |
| 88.                 | Star anise, type CO <sub>2</sub>    | Ultra International      | 84650-59-9   | <i>Illicium verum</i> Hook. f.                                                               | India        | >400  | >400  | >400   | 800   | >400  | >400  | 400   | >400  | >400  | >400  |
| 89.                 | Anise EO                            | Berje Inc.               | 283-518-1    | <i>Illicium verum</i> Hook. f.                                                               | China        | 400   | >400  | >400   | >400  | >400  | 200   | 400   | >400  | >400  | >400  |
| Scrophulariaceae    |                                     |                          |              |                                                                                              |              |       |       |        |       |       |       |       |       |       |       |
| 90.                 | Buddawood EO                        | Ultra International      | 1429902-59-9 | <i>Eremophila mitchellii</i> Benth.                                                          | Australia    | >400  | 800   | 800    | >400  | >400  | >400  | 400   | 800   | 800   | >400  |
| Solanaceae          |                                     |                          |              |                                                                                              |              |       |       |        |       |       |       |       |       |       |       |
| 91.                 | Capsicum oleoresin 1.000.000 SHU    | Lluch Essence            | 8023-77-6    | <i>Capsicum annuum</i> var. <i>annuum</i> L.                                                 | India        | 400   | >400  | >400   | >400  | >400  | >400  | >400  | >400  | >400  | >400  |
| 92.                 | Paprika Oleoresin 40.000 CU         | Lluch Essence            | 84625-29-6   |                                                                                              | India        | >400  | >400  | >400   | >400  | >400  | >400  | >400  | >400  | >400  | >400  |
| 93.                 | Paprika Oleoresin 80.000 CU         | Lluch Essence            | 84625-29-6   |                                                                                              | India        | >400  | >400  | >400   | >400  | >400  | >400  | >400  | >400  | >400  | >400  |
| Valerianaceae       |                                     |                          |              |                                                                                              |              |       |       |        |       |       |       |       |       |       |       |
| 94.                 | Valerian EO                         | Berje Inc.               | 616-930-0    | <i>Valeriana officinalis</i> L.                                                              | China        | >400  | >400  | >400   | >400  | >400  | 400   | >400  | >400  | >400  | >400  |
| Verbenaceae         |                                     |                          |              |                                                                                              |              |       |       |        |       |       |       |       |       |       |       |
| 95.                 | Verbena EO                          | Lluch Essence            | 8024-12-2    | <i>Lippia citriodora</i> Kunth.                                                              | Morocco      | >400  | >400  | >400   | >400  | >400  | >400  | 200   | >400  | >400  | >400  |
| Vitaceae            |                                     |                          |              |                                                                                              |              |       |       |        |       |       |       |       |       |       |       |
| 96.                 | Cognac white EO                     | Berje Inc.               | 232-403-4    | <i>Vitis vinifera</i> L.                                                                     | USA          | 100   | 800   | >400   | 800   | >400  | 100   | 200   | >400  | 800   | >400  |
| Zingiberaceae       |                                     |                          |              |                                                                                              |              |       |       |        |       |       |       |       |       |       |       |
| 97.                 | Cardamom green CO <sub>2</sub>      | Ultra International      | 8000-66-6    | <i>Elettaria cardamomum</i> (L.) Maton                                                       | India        | 400   | 800   | >400   | >400  | >400  | >400  | 400   | 800   | 800   | >400  |
| 98.                 | Ginger EO                           | Ultra International      | 8007-08-7    | <i>Zingiber officinale</i> Roscoe                                                            | India        | >400  | 200   | 100    | 400   | >400  | 100   | >400  | 800   | 800   | >400  |
| 99.                 | Turmeric CO <sub>2</sub>            | Ultra International      | 8024-37-1    | <i>Curcuma longa</i> L.                                                                      | India        | >400  | >400  | >400   | >400  | >400  | >400  | >400  | >400  | >400  | >400  |
| Antibiotics [µg/ml] |                                     |                          |              |                                                                                              |              |       |       |        |       |       |       |       |       |       |       |
|                     | Gentamicin                          |                          |              |                                                                                              |              | 5.000 | 1.000 |        |       |       | 2.000 | 0.625 |       |       |       |
|                     | Ciprofloxacin                       |                          |              |                                                                                              |              |       | 0.625 |        |       |       | 0.008 | 0.019 | 0.250 | 0.019 | 0.500 |
|                     | Ampicillin                          |                          |              |                                                                                              |              |       |       | 0.0625 | 0.250 | 0.008 |       |       |       |       |       |
